# Supplementary material for: Facile electrochemical assisted synthesis of ZnO/graphene nanosheets with enhanced photocatalytic activity
Source: Royal Society of Chemistry journal article supplement (doi:10.1039/c5ra22372e), 2015-01-01
Supplement: c5ra22372e1.pdf [file c5ra22372e1.pdf]

## **Supporting Information**

### **Facile electrochemical assisted synthesis of ZnO/graphene nanosheets with enhanced photocatalytic activity**

Sandesh Y. Sawant and Moo Hwan Cho\*

School of Chemical Engineering, Yeungnam University,

Gyeongsan-si, Gyeongbuk 712-749, South Korea.

E-mail: mhcho@ynu.ac.kr; Fax: +82-53-810-4631; Tel: +82-53-810-2517

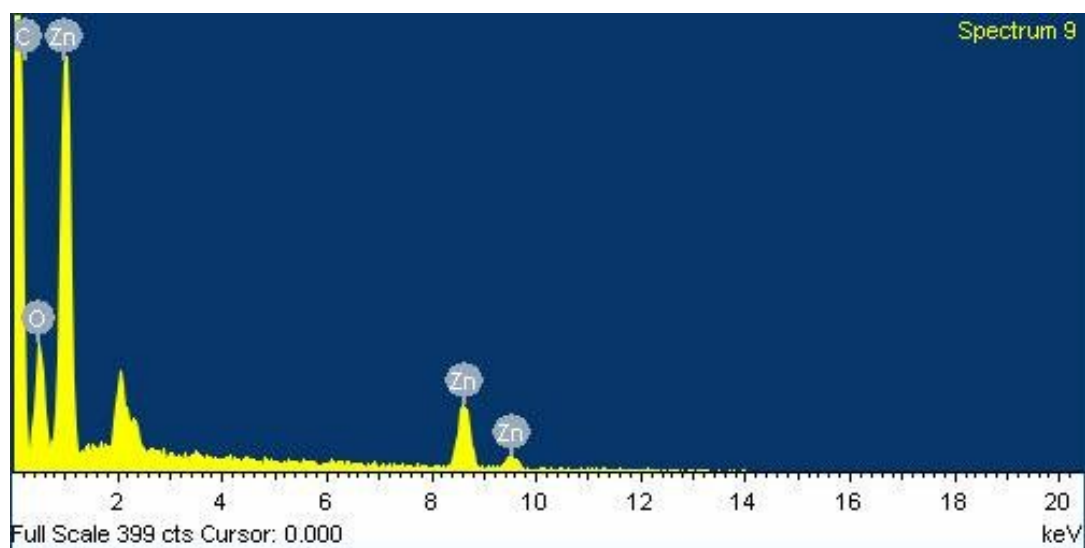

**Fig. S1** EDX spectrum of ZnO/Gr\_7 nanocomposite.

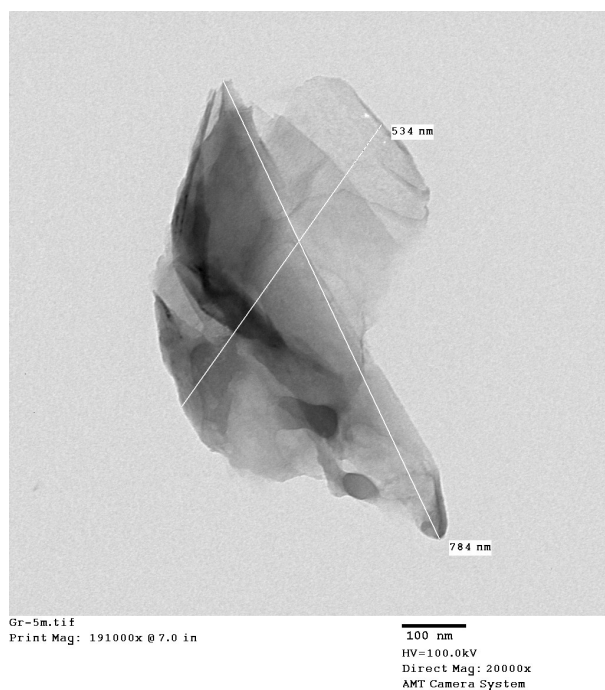

**Fig. S2** TEM image of graphene sheet prepared using electrochemical exfoliation.

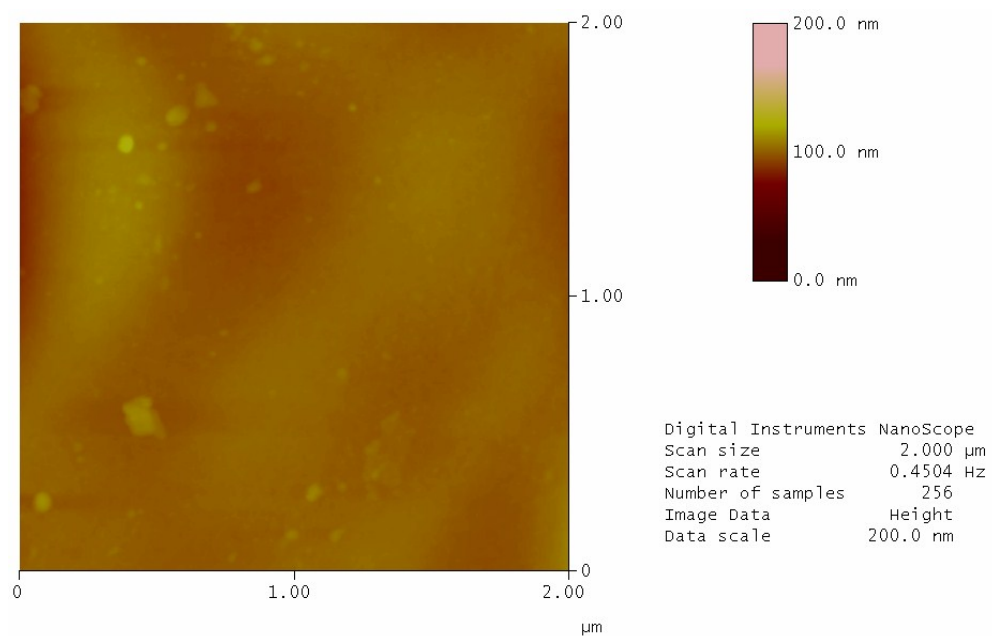

**Fig. S3** AFM image showing the electrochemically exfoliated graphene sheets with different shapes and sizes.

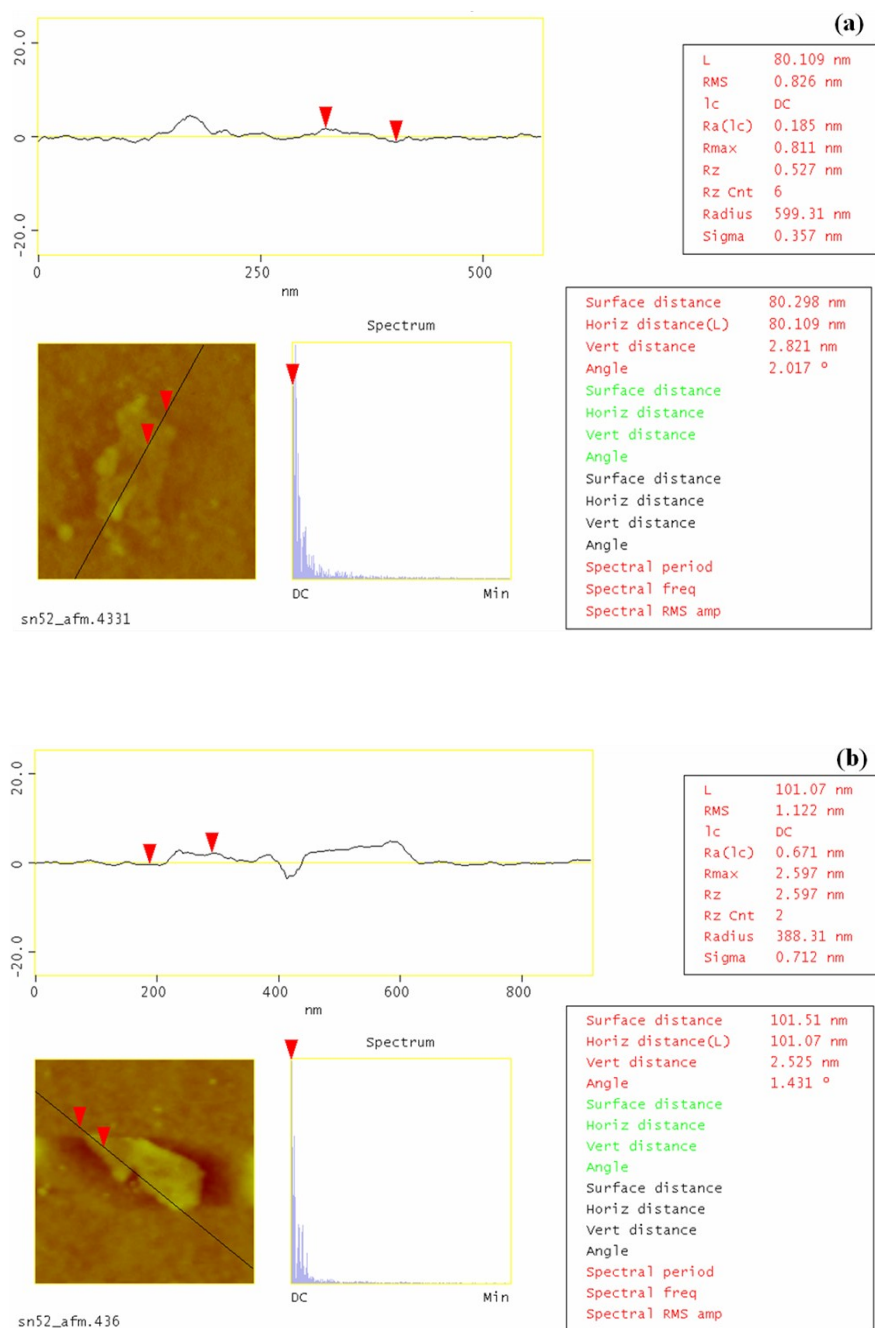

**Fig. S4** AFM image showing the sectional analysis of the two different graphene particles.

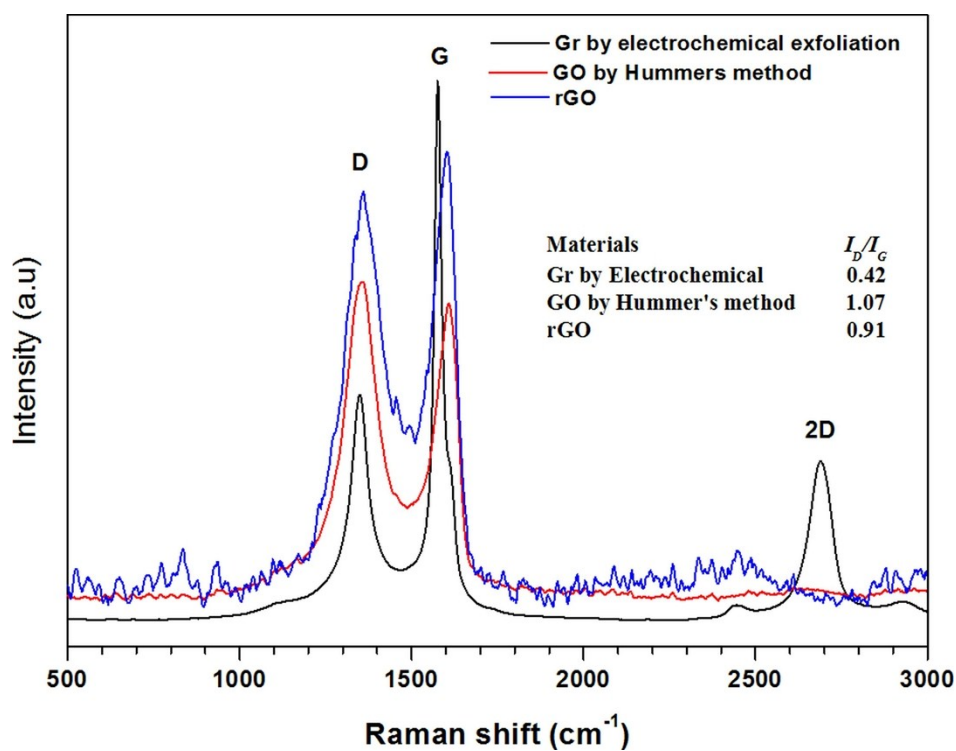

**Fig. S5** Raman spectra of graphene produced using electrochemical exfoliation, GO and RGO.

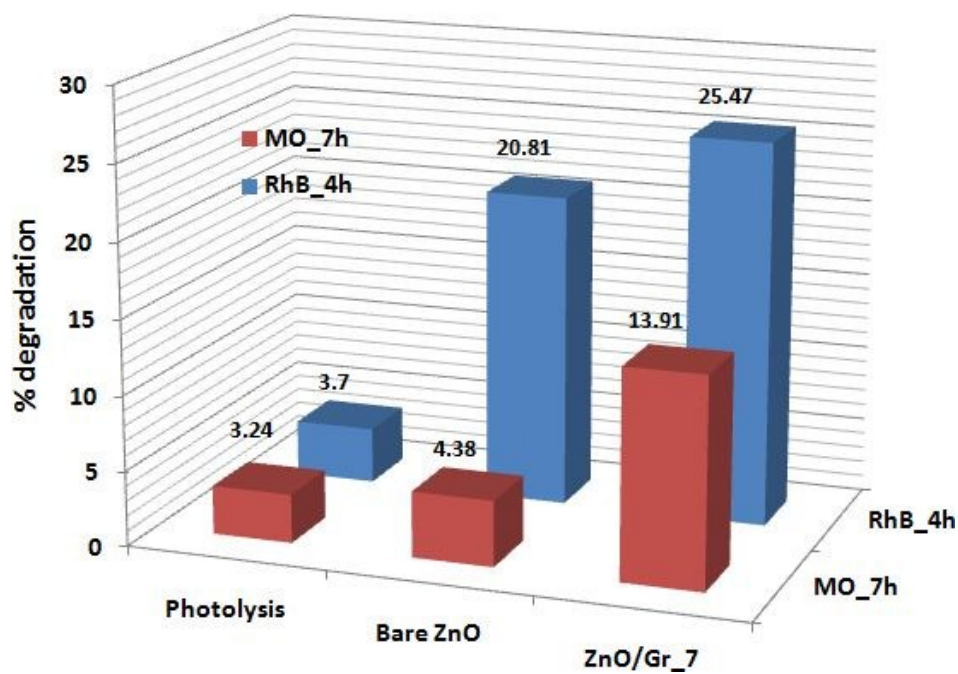

**Fig. S6** Photolysis and photocatalytic performance of bare ZnO and ZnO/Gr<sub>7</sub> under visible light for degradation of MO after 7 h and RhB after 4 h.

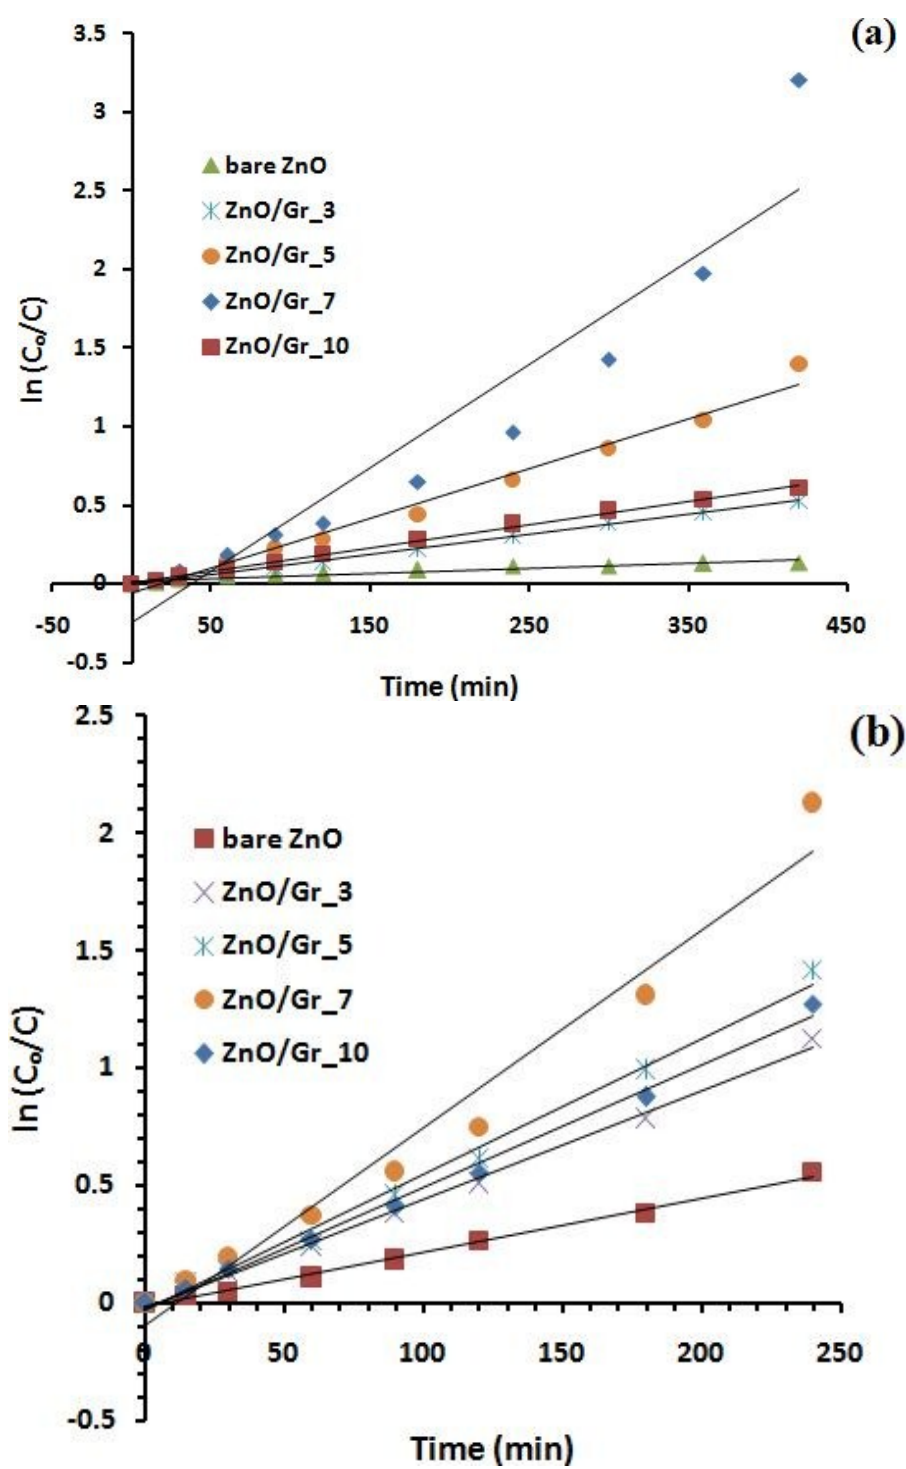

**Fig. S7** Pseudo-first order kinetics plots of (a) MO and (b) RhB degradation using ZnO/Gr\_7 under UV radiation.

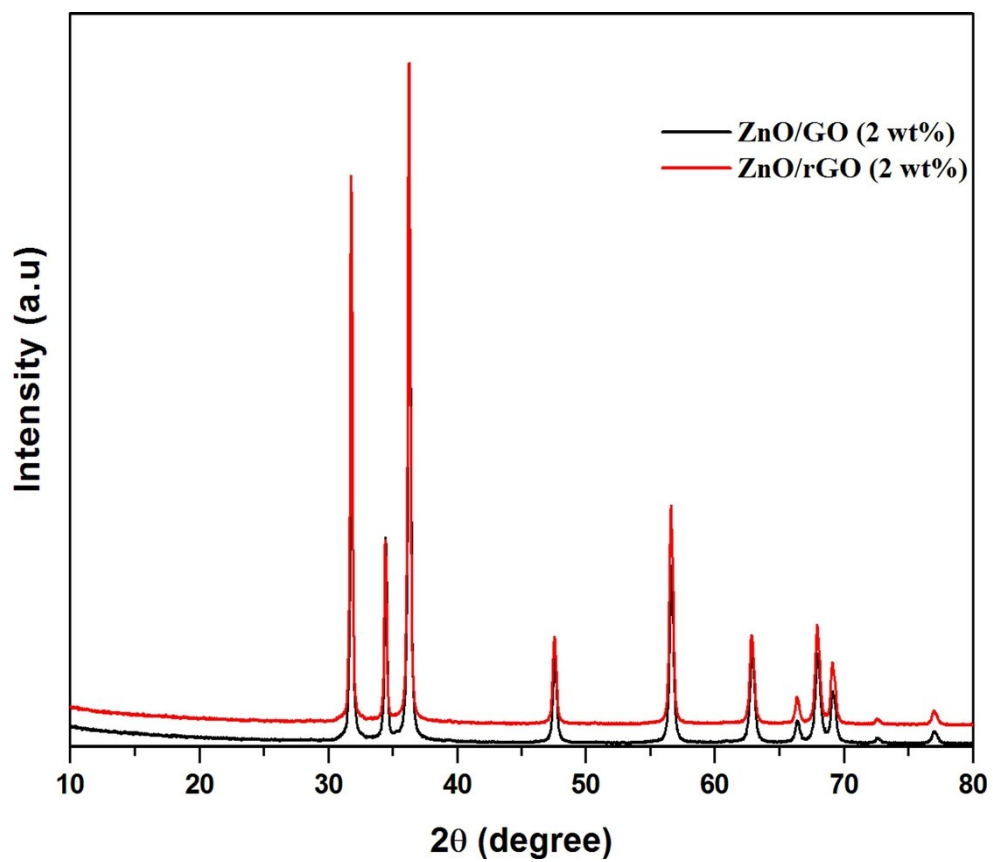

**Fig. S8** XRD pattern of ZnO/GO and ZnO/rGO synthesized using KOH precipitation method.
